# Supplementary material
Source: MDPI journal article supplement (https://www.mdpi.com/2297-8739/8/7/97)
Supplement: s1 [file s1]

## **SUPPLEMENTARY INFORMATION**

### **Targeted expression of TGFB $\beta$ peptides in mouse and human tissue by MALDI-Mass Spectrometry Imaging**

Venkatraman Anandalakshmi<sup>1\*</sup>, Guillaume Hochart<sup>2\*</sup>, David Bonnel<sup>2</sup>, Jonathan Stauber<sup>2</sup>, Shigeto Shimmura<sup>3</sup>, Rajamani Lakshminaryanan<sup>1,4</sup>, Konstantin Pervushin<sup>5</sup> and Jodhbir S. Mehta<sup>1,4,6</sup>

<sup>1</sup>Singapore Eye Research Institute, 11 Third Hospital Avenue, Singapore 168751

<sup>2</sup>ImaBiotech, Parc Eurasanté, 152 rue du Docteur Yersin, Loos, France 59120

<sup>3</sup>Department of Ophthalmology, Keio University, 35 Shinanomachi, Shinjuku Tokyo, Japan.

<sup>4</sup>Ophthalmology and Visual Sciences Academic Clinical Program, Duke-NUS Graduate Medical School, Singapore, Singapore 169857

<sup>5</sup>School of Biological Sciences, Nanyang Technological University, Singapore 637551

<sup>6</sup>Singapore National Eye Centre, 11 Third Hospital Avenue, Singapore 168751

\* Both authors (VA and GH) contributed equally towards the publication.

**Supplementary Table S1:** *TGFBI* mouse digests in solution matching with in silico digestion (2 missed cleavages allowed). 21 peptide digests from *TGFBI* were obtained.

| Range     | Miscleavages | Theoretical<br>[M+H] <sup>+</sup> | Experimental<br>[M+H] <sup>+</sup> | Mass accuracy<br>(ppm) | Sequence           |
|-----------|--------------|-----------------------------------|------------------------------------|------------------------|--------------------|
| [462-464] | 1            | 416.298                           | 416.29775                          | 2.5                    | KLR                |
| [663-666] | 0            | 445.2518                          | 445.251666                         | 2.3                    | AAQR               |
| [91-95]   | 0            | 529.298                           | 529.298371                         | 2.1                    | VPGEK              |
| [677-680] | 0            | 530.3297                          | 530.330071                         | 1.9                    | LLER               |
| [422-426] | 0            | 543.2885                          | 543.287468                         | 1.5                    | DGVPR              |
| [54-59]   | 0            | 631.3774                          | 631.377337                         | 1.3                    | VIGTNK             |
| [350-355] | 0            | 631.3774                          | 631.377337                         | 1.2                    | AVISNK             |
| [465-469] | 0            | 683.3875                          | 683.386065                         | 0.6                    | VFVYR              |
| [67-71]   | 0            | 780.3787                          | 780.3787                           | 0.4                    | QWYQR              |
| [656-662] | 0            | 782.3791                          | 782.379335                         | 0.3                    | QASAYSR            |
| [180-186] | 0            | 817.4666                          | 817.467336                         | 0.1                    | VLTDELK            |
| [173-178] | 0            | 820.377                           | 820.37741                          | 0.1                    | YHMOVDR            |
| [564-570] | 0            | 830.4982                          | 830.496124                         | 0                      | ELTNILK            |
| [670-676] | 0            | 846.4832                          | 846.483454                         | -0.3                   | LAPVYQR            |
| [603-610] | 0            | 873.4789                          | 873.479686                         | -0.3                   | NNVSVNKK           |
| [288-295] | 0            | 913.5102                          | 913.509012                         | -0.5                   | IPAETLNR           |
| [173-179] | 1            | 976.4781                          | 976.479467                         | -0.7                   | YHMOVDRR           |
| [296-304] | 0            | 983.552                           | 983.549738                         | -0.7                   | ILGDPEALR          |
| [305-313] | 0            | 1079.6208                         | 1079.6195                          | -0.9                   | DLLNNHILK          |
| [488-496] | 0            | 1087.5241                         | 1087.5253                          | -0.9                   | FGLFTMDR           |
| [591-602] | 1            | 1290.69                           | 1290.68948                         | -1.1                   | SLQGDKLEVSSK       |
| [497-510] | 0            | 1532.7885                         | 1532.7862                          | -1.4                   | MLTPPMGTVM<br>DVLK |

**Supplementary Figure S1:** H&E and Congo red staining for mouse, human samples as adopted from [1](control and diseased)

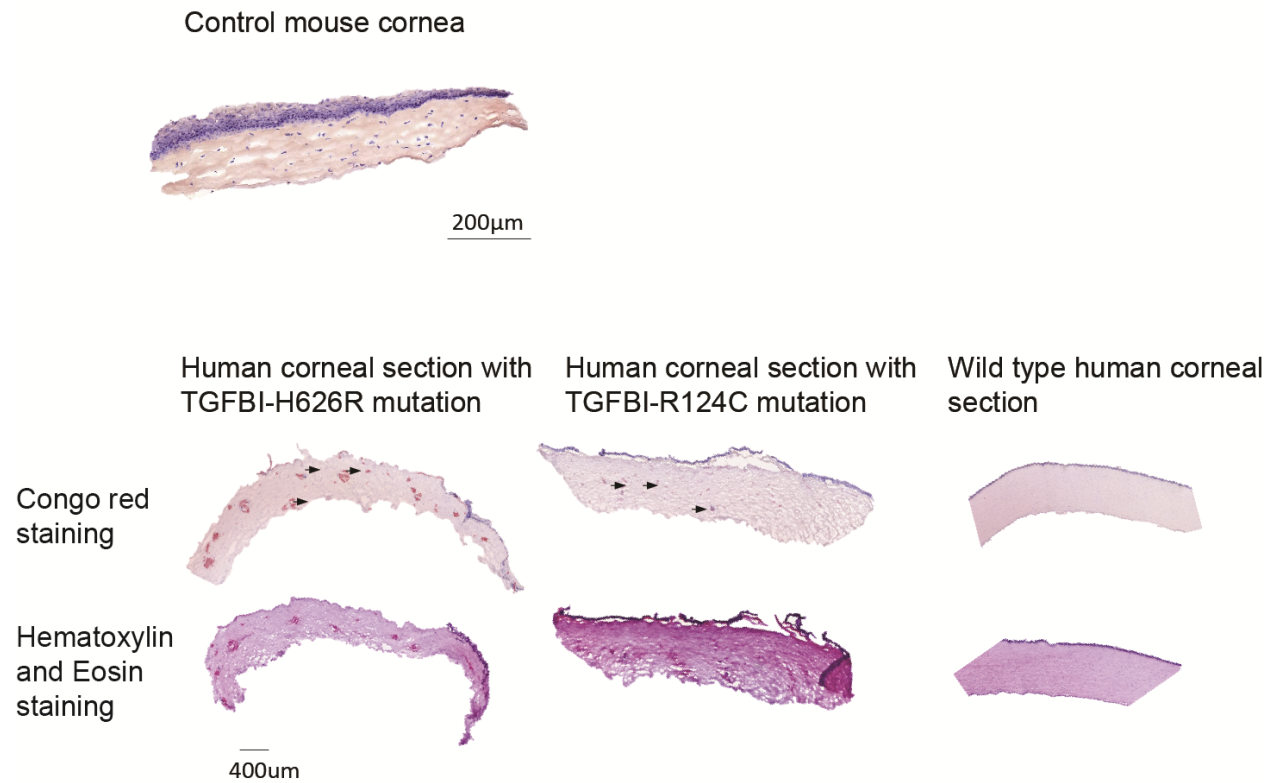

**Supplementary Figure S2:** 7T-MALDI-FTICR spectrum of TGFBIp digest in solution matching (A) with in silico digestion (2 missed cleavages allowed). 17 peptide digests from TGFBIp were obtained. Each \* in the spectrum corresponds to unique m/z digest of TGFBIp matching with the in-silico approach and thus reported in the study. Other major peaks may correspond to the trypsin only or non-reported peptides in the reaction mixture.

Mass spectrum of digested TGFBI from m/z 300 to m/z 2000.

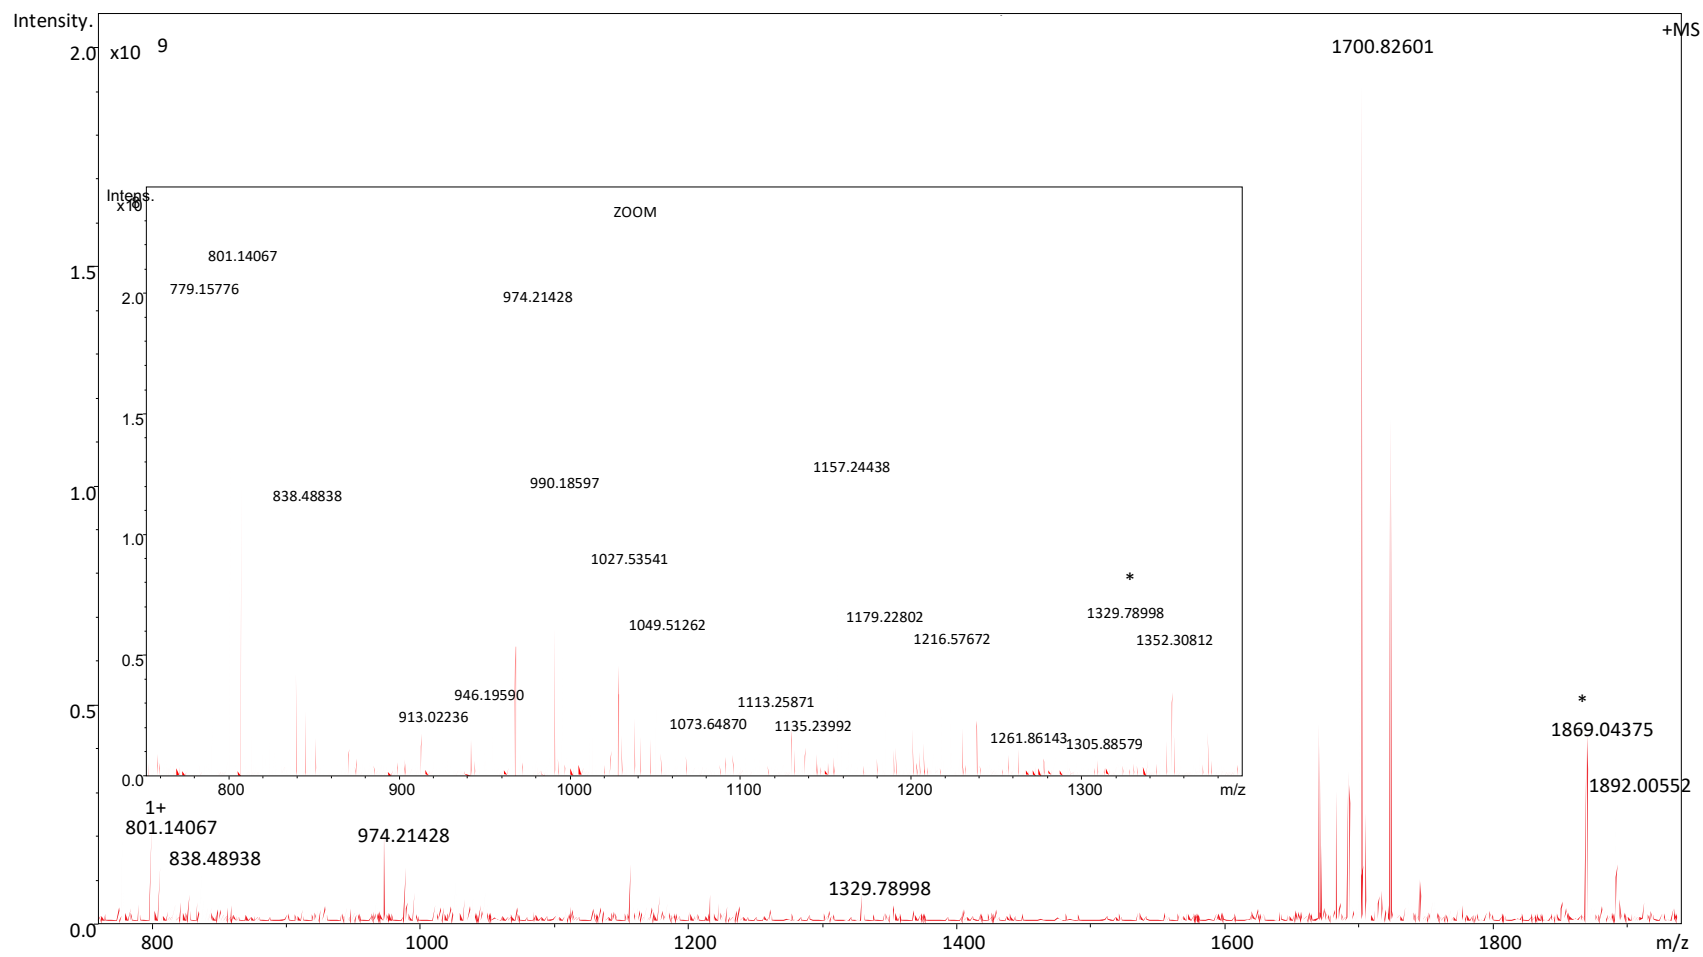

**Supplementary Table S2:** 7T-MALDI-FTICR spectrum of TGFBIp digest in solution matching. The major peaks may correspond to the trypsin only or non-reported peptides in the reaction mixture.

| Range     | [M+H] <sup>+</sup> | Miscleavages | Sequence           |
|-----------|--------------------|--------------|--------------------|
| [ 73- 76] | 420.228            | 0            | ICGK               |
| [656-662] | 766.384            | 0            | QASAFSR            |
| [670-676] | 818.477            | 0            | LAPVYQK            |
| [549-555] | 838.489            | 1            | ALPPRER            |
| [556-563] | 859.5              | 1            | SRLLGDAK           |
| [667-676] | 1160.679           | 1            | SVRLAPVYQK         |
| [422-432] | 1179.575           | 0            | DGTPPIDAHTR        |
| [670-680] | 1329.789           | 1            | LAPVYQKLLER        |
| [ 41- 53] | 1393.712           | 1            | GRQHGPNVCAVQK      |
| [643-655] | 1407.7             | 0            | GDELADSALEIFK      |
| [656-669] | 1550.815           | 2            | QASAFSRASQRSVR     |
| [589-602] | 1557.921           | 2            | LKSLQGDKLEVSLK     |
| [448-461] | 1579.811           | 0            | YLYHGQTLETGGK      |
| [220-234] | 1626.835           | 0            | ADHHATNGVVHLIDK    |
| [556-570] | 1640.969           | 2            | SRLLGDAKELANILK    |
| [534-548] | 1700.828           | 0            | EGVYTVFAPTNEAFR    |
| [571-588] | 1869.023           | 0            | YHIGDEILVSGGIGALVR |

**Supplementary Figure S3:** Search parameters used for TFGBlp as adopted from [1] to match PMF obtained from the control and treated tissue sections.

### Search Parameters

Type of search : Peptide Mass Fingerprint  
 Enzyme : Trypsin  
 Mass values : Monoisotopic  
 Protein Mass : Unrestricted  
 Peptide Mass Tolerance :  $\pm 0.1$  ppm  
 Peptide Charge State : 1+  
 Max Missed Cleavages : 2  
 Number of queries : 1

|                                                                                                            |             |           |                 |            |
|------------------------------------------------------------------------------------------------------------|-------------|-----------|-----------------|------------|
| <a href="#">TISD_HUMAN</a>                                                                                 | Mass: 51031 | Score: 16 | Expect: 5e+02   | Matches: 1 |
| mRNA decay activator protein ZFP36L2 OS=Homo sapiens OX=9606 GN=ZFP36L2 PE=1 SV=3                          |             |           |                 |            |
| <a href="#">GDF5_HUMAN</a>                                                                                 | Mass: 55376 | Score: 16 | Expect: 5e+02   | Matches: 1 |
| Growth/differentiation factor 5 OS=Homo sapiens OX=9606 GN=GDF5 PE=1 SV=3                                  |             |           |                 |            |
| <a href="#">APEX2_HUMAN</a>                                                                                | Mass: 57364 | Score: 16 | Expect: 5.1e+02 | Matches: 1 |
| DNA-(apurinic or apyrimidinic site) lyase 2 OS=Homo sapiens OX=9606 GN=APEX2 PE=1 SV=1                     |             |           |                 |            |
| <a href="#">ZNF695_HUMAN</a>                                                                               | Mass: 60109 | Score: 16 | Expect: 5.2e+02 | Matches: 1 |
| Zinc finger protein 695 OS=Homo sapiens OX=9606 GN=ZNF695 PE=1 SV=4                                        |             |           |                 |            |
| <a href="#">KCNN2_HUMAN</a>                                                                                | Mass: 63719 | Score: 16 | Expect: 5.7e+02 | Matches: 1 |
| Small conductance calcium-activated potassium channel protein 2 OS=Homo sapiens OX=9606 GN=KCNN2 PE=1 SV=2 |             |           |                 |            |
| <a href="#">CRT3_HUMAN</a>                                                                                 | Mass: 66918 | Score: 15 | Expect: 6.2e+02 | Matches: 1 |
| CREB-regulated transcription coactivator 3 OS=Homo sapiens OX=9606 GN=CRT3 PE=1 SV=2                       |             |           |                 |            |
| <a href="#">PALM3_HUMAN</a>                                                                                | Mass: 71652 | Score: 15 | Expect: 6.7e+02 | Matches: 1 |
| Paralemmin-3 OS=Homo sapiens OX=9606 GN=PALM3 PE=1 SV=2                                                    |             |           |                 |            |
| <a href="#">BGH3_HUMAN</a>                                                                                 | Mass: 74634 | Score: 15 | Expect: 6.7e+02 | Matches: 1 |
| Transforming growth factor-beta-induced protein ig-h3 OS=Homo sapiens OX=9606 GN=TGFB1 PE=1 SV=1           |             |           |                 |            |
| <a href="#">SETMR_HUMAN</a>                                                                                | Mass: 77984 | Score: 15 | Expect: 6.7e+02 | Matches: 1 |
| Histone-lysine N-methyltransferase SETMAR OS=Homo sapiens OX=9606 GN=SETMAR PE=1 SV=2                      |             |           |                 |            |
| <a href="#">PPP3R3_HUMAN</a>                                                                               | Mass: 74721 | Score: 15 | Expect: 6.9e+02 | Matches: 1 |
| Protein phosphatase 1 regulatory subunit 37 OS=Homo sapiens OX=9606 GN=PPP1R37 PE=1 SV=4                   |             |           |                 |            |
| <a href="#">TGM6_HUMAN</a>                                                                                 | Mass: 79263 | Score: 15 | Expect: 7.1e+02 | Matches: 1 |
| Protein-glutamine gamma-glutamyltransferase 6 OS=Homo sapiens OX=9606 GN=TGM6 PE=1 SV=3                    |             |           |                 |            |
| <a href="#">KCNN3_HUMAN</a>                                                                                | Mass: 81334 | Score: 14 | Expect: 7.2e+02 | Matches: 1 |
| Small conductance calcium-activated potassium channel protein 3 OS=Homo sapiens OX=9606 GN=KCNN3 PE=2 SV=2 |             |           |                 |            |
| <a href="#">ZNF585B_HUMAN</a>                                                                              | Mass: 88009 | Score: 14 | Expect: 7.6e+02 | Matches: 1 |
| Zinc finger protein 585B OS=Homo sapiens OX=9606 GN=ZNF585B PE=2 SV=1                                      |             |           |                 |            |
| <a href="#">RRF2M_HUMAN</a>                                                                                | Mass: 86546 | Score: 14 | Expect: 7.7e+02 | Matches: 1 |
| Ribosome-releasing factor 2, mitochondrial OS=Homo sapiens OX=9606 GN=GFM2 PE=1 SV=1                       |             |           |                 |            |
| <a href="#">ZNF629_HUMAN</a>                                                                               | Mass: 96559 | Score: 14 | Expect: 8.5e+02 | Matches: 1 |
| Zinc finger protein 629 OS=Homo sapiens OX=9606 GN=ZNF629 PE=1 SV=2                                        |             |           |                 |            |

**Supplementary Figure S4 as adopted from [1]:** MS/MS fragmentation of *m/z* 838.489 in (a) Digested human cornea, (b) Control trypsin only and (c) Query of the MS/MS in Mascot database

A

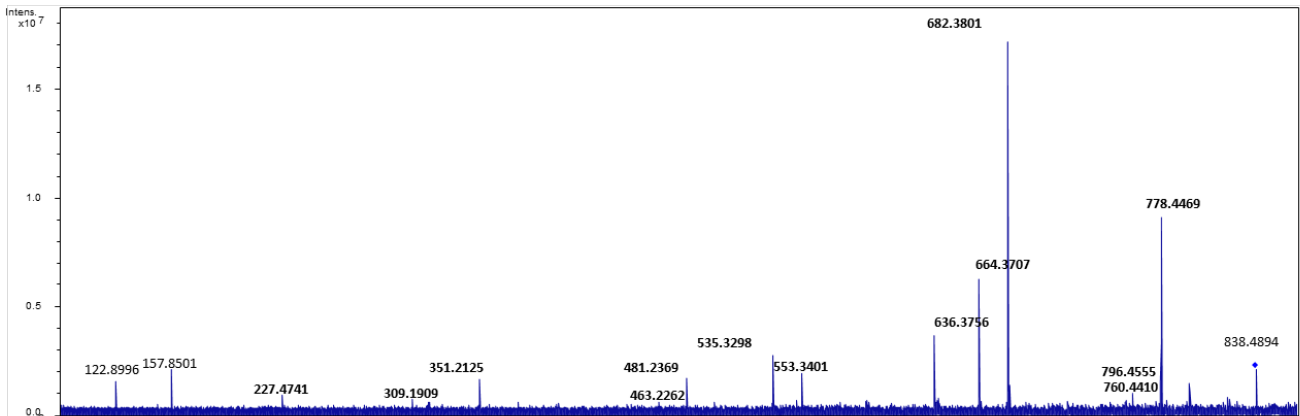

B

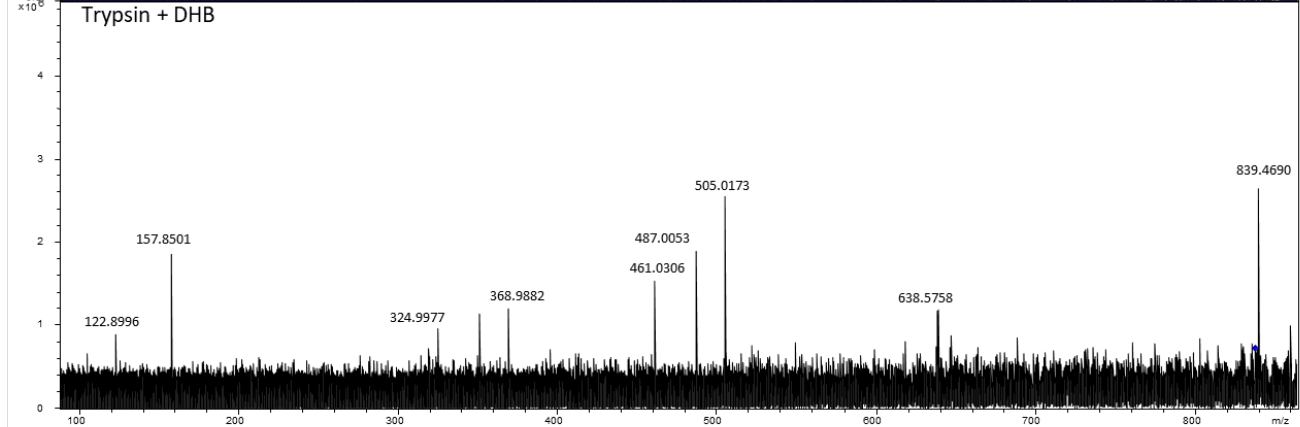

c)

| Search Parameters       |                    |
|-------------------------|--------------------|
| Type of search          | : MS/MS Ion Search |
| Enzyme                  | : Trypsin          |
| Mass values             | : Monoisotopic     |
| Protein Mass            | : Unrestricted     |
| Peptide Mass Tolerance  | : ± 0.015 Da       |
| Fragment Mass Tolerance | : ± 0.03 Da        |
| Max Missed Cleavages    | : 2                |
| Instrument type         | : Default          |
| Number of queries       | : 1                |

1. [BGH3 HUMAN](#) Mass: 74634 Score: 3 Matches: 1(0) Sequences: 1(0)  
Transforming growth factor-beta-induced protein ig-h3 OS=Homo sapiens GN=IGFBI PE=1 SV=1  
☐ Check to include this hit in error tolerant search

| Query             | Observed | Mr(expt) | Mr(calc) | Delta  | Miss | Score | Expect | Rank | Unique | Peptide     |
|-------------------|----------|----------|----------|--------|------|-------|--------|------|--------|-------------|
| <a href="#">1</a> | 838.5026 | 837.4953 | 837.4821 | 0.0133 | 1    | 3     | 2.7    | 1    | U      | R.ALPPRER.S |

2. [FOXNB HUMAN](#) Mass: 18613 Score: 2 Matches: 1(0) Sequences: 1(0)  
FOXNL2 neighbor protein OS=Homo sapiens GN=FOXNL2NB PE=2 SV=1  
☐ Check to include this hit in error tolerant search

| Query             | Observed | Mr(expt) | Mr(calc) | Delta  | Miss | Score | Expect | Rank | Unique | Peptide     |
|-------------------|----------|----------|----------|--------|------|-------|--------|------|--------|-------------|
| <a href="#">1</a> | 838.5026 | 837.4953 | 837.4821 | 0.0133 | 1    | 2     | 3.5    | 2    | U      | R.RLPAPER.E |

3. [ZNF695 HUMAN](#) Mass: 60109 Score: 2 Matches: 1(0) Sequences: 1(0)  
Zinc finger protein 695 OS=Homo sapiens GN=ZNF695 PE=1 SV=4  
☐ Check to include this hit in error tolerant search

| Query             | Observed | Mr(expt) | Mr(calc) | Delta  | Miss | Score | Expect | Rank | Unique | Peptide      |
|-------------------|----------|----------|----------|--------|------|-------|--------|------|--------|--------------|
| <a href="#">1</a> | 838.5026 | 837.4953 | 837.4821 | 0.0133 | 1    | 2     | 3.6    | 3    | U      | K.RIHVGKEK.H |

4. [TGM3L HUMAN](#) Mass: 79263 Score: 2 Matches: 1(0) Sequences: 1(0)  
Protein-glutamine gamma-glutamyltransferase 6 OS=Homo sapiens GN=TGM6 PE=1 SV=3  
☐ Check to include this hit in error tolerant search

| Query             | Observed | Mr(expt) | Mr(calc) | Delta  | Miss | Score | Expect | Rank | Unique | Peptide     |
|-------------------|----------|----------|----------|--------|------|-------|--------|------|--------|-------------|
| <a href="#">1</a> | 838.5026 | 837.4953 | 837.4821 | 0.0133 | 1    | 2     | 3.6    | 4    | U      | R.GVEKHIR.A |

Supplementary Figure S5:

BLAST Results of the peptides showing TGFB1p to be the best hit protein. This shows the specificity of the peptide to TGFB1p

Blast queries Parameters  
Non-redundant UniProtKB/Swissprot sequences  
Humans taxid:9605

| Sequence     | Experimental <i>m/z</i> | First Blast result |
|--------------|-------------------------|--------------------|
| ALPPRER      | 838.489                 | TGFB1-p Big-h3     |
| VIGTNRK      | 787.474                 | TGFB1-p Big-h3     |
| IPSETLNR     | 929.508                 | TGFB1-p Big-h3     |
| DGTPPIDAHTR  | 1179.579                | TGFB1-p Big-h3     |
| LTLLAPLNSVFK | 1315.802                | TGFB1-p Big-h3     |

Peptide ALPPRER (m/z 838.489)

|               |                                                                                                                                                                                            |                                                                                                                 |         |                                                                                                                  |
|---------------|--------------------------------------------------------------------------------------------------------------------------------------------------------------------------------------------|-----------------------------------------------------------------------------------------------------------------|---------|------------------------------------------------------------------------------------------------------------------|
| ALPPRER       | 838.4894                                                                                                                                                                                   | -0.923                                                                                                          | 549-555 | 1                                                                                                                |
| Job Title     | Protein Sequence                                                                                                                                                                           |                                                                                                                 |         |                                                                                                                  |
| RID           | <a href="#">ZUSC47SN013</a>                                                                                                                                                                | Search expires on 01-13 15:44 pm                                                                                |         | <a href="#">Download All</a>  |
| Program       | BLASTP                                                                                                  | <a href="#">Citation</a>     |         |                                                                                                                  |
| Database      | swissprot                                                                                                                                                                                  | <a href="#">See details</a>  |         |                                                                                                                  |
| Query ID      | Ic Query_45689                                                                                                                                                                             |                                                                                                                 |         |                                                                                                                  |
| Description   | None                                                                                                                                                                                       |                                                                                                                 |         |                                                                                                                  |
| Molecule type | amino acid                                                                                                                                                                                 |                                                                                                                 |         |                                                                                                                  |
| Query Length  | 7                                                                                                                                                                                          |                                                                                                                 |         |                                                                                                                  |
| Other reports | <a href="#">Distance tree of results</a> <a href="#">Multiple alignment</a> <a href="#">MSA viewer</a>  |                                                                                                                 |         |                                                                                                                  |

Filter Results

Organism

only top 20 will appear

☐ exclude

Type common name, binomial, taxid or group name

[+ Add organism](#)

Percent Identity

E value

Query Coverage

to

to

to

Filter

Reset

| Descriptions                                                                                                                                                                             | Graphic Summary              | Alignments | Taxonomy    |             |         |            |          |                          |
|------------------------------------------------------------------------------------------------------------------------------------------------------------------------------------------|------------------------------|------------|-------------|-------------|---------|------------|----------|--------------------------|
| Sequences producing significant alignments                                                                                                                                               |                              |            |             |             |         |            |          |                          |
| Download <span>▼</span> <span>New</span> Select columns <span>▼</span> Show <span>100</span> <span>▼</span> <span>?</span>                                                               |                              |            |             |             |         |            |          |                          |
| <input checked="" type="checkbox"/> select all 100 sequences selected                                                                                                                    |                              |            |             |             |         |            |          |                          |
| <a href="#">GenPept</a> <a href="#">Graphics</a> <a href="#">Distance tree of results</a> <a href="#">Multiple alignment</a> <span>New</span> <a href="#">MSA Viewer</a>                 |                              |            |             |             |         |            |          |                          |
| Description                                                                                                                                                                              | Scientific Name              | Max Score  | Total Score | Query Cover | E value | Per. Ident | Acc. Len | Accession                |
| <input checked="" type="checkbox"/> RecName: Full=Transforming growth factor-beta-induced protein Ig-h3; Short=Beta Ig-h3; AltName: Full=Kerato-epitheli... <a href="#">Homo sapiens</a> | <a href="#">Homo sapiens</a> | 25.7       | 25.7        | 100%        | 0.075   | 100.00%    | 683      | <a href="#">Q15582.1</a> |
| <input checked="" type="checkbox"/> RecName: Full=AP-5 complex subunit zeta-1; AltName: Full=Adaptor-related protein complex 5 zeta subunit; Short=Zet... <a href="#">Homo sapiens</a>   | <a href="#">Homo sapiens</a> | 23.1       | 23.1        | 85%         | 0.62    | 100.00%    | 807      | <a href="#">Q43299.2</a> |
| <input checked="" type="checkbox"/> RecName: Full=BTB/POZ domain-containing protein KCID7 <a href="#">[Homo sapiens]</a>                                                                 | <a href="#">Homo sapiens</a> | 23.1       | 23.1        | 85%         | 0.62    | 100.00%    | 289      | <a href="#">Q96MP8.1</a> |
| <input checked="" type="checkbox"/> RecName: Full=Vertnin <a href="#">[Homo sapiens]</a>                                                                                                 | <a href="#">Homo sapiens</a> | 22.3       | 22.3        | 85%         | 1.2     | 100.00%    | 702      | <a href="#">Q9H8Y1.1</a> |
| <input checked="" type="checkbox"/> RecName: Full=Endoplasmic reticulum-Golgi intermediate compartment protein 2 <a href="#">[Homo sapiens]</a>                                          | <a href="#">Homo sapiens</a> | 22.3       | 22.3        | 85%         | 1.2     | 100.00%    | 377      | <a href="#">Q96RQ1.2</a> |
| <input checked="" type="checkbox"/> RecName: Full=Forkhead box protein D4-like 3; Short=FOXO4-like 3 <a href="#">[Homo sapiens]</a>                                                      | <a href="#">Homo sapiens</a> | 21.4       | 33.9        | 100%        | 2.5     | 85.71%     | 417      | <a href="#">Q6VB84.2</a> |
| <input checked="" type="checkbox"/> RecName: Full=Forkhead box protein D4-like 6; Short=FOXO4-like 6 <a href="#">[Homo sapiens]</a>                                                      | <a href="#">Homo sapiens</a> | 21.4       | 33.9        | 100%        | 2.5     | 85.71%     | 417      | <a href="#">Q3SYB3.2</a> |
| <input checked="" type="checkbox"/> RecName: Full=Forkhead box protein D4-like 5; Short=FOXO4-like 5 <a href="#">[Homo sapiens]</a>                                                      | <a href="#">Homo sapiens</a> | 21.4       | 33.9        | 100%        | 2.5     | 85.71%     | 416      | <a href="#">Q5VV16.1</a> |
| <input checked="" type="checkbox"/> RecName: Full=Forkhead box protein D4-like 4; Short=FOXO4-like 4; AltName: Full=Forkhead box protein D4-like 2; Alt... <a href="#">Homo sapiens</a>  | <a href="#">Homo sapiens</a> | 21.4       | 33.9        | 100%        | 2.5     | 85.71%     | 416      | <a href="#">Q8WXT5.2</a> |



Peptide VIGTNRK (m/z 787.474)

VIGTNRK 787.478 787.474 0.004 5.07 TGFB1\*

| Job Title     | Protein Sequence                                                                                                         |
|---------------|--------------------------------------------------------------------------------------------------------------------------|
| RID           | ZUSBCXSS016 <small>Search expires on 01-13 15:44 pm</small> <a href="#">Download All</a> ▼                               |
| Program       | BLASTP <a href="#">Citation</a> ▼                                                                                        |
| Database      | swissprot <a href="#">See details</a> ▼                                                                                  |
| Query ID      | lcl Query_21095                                                                                                          |
| Description   | None                                                                                                                     |
| Molecule type | amino acid                                                                                                               |
| Query Length  | 7                                                                                                                        |
| Other reports | <a href="#">Distance tree of results</a> <a href="#">Multiple alignment</a> <a href="#">MSA viewer</a> <a href="#">?</a> |

Filter Results

Organism only top 20 will appear ☐ exclude

[+ Add organism](#)

Percent Identity  to

E value  to

Query Coverage  to

Filter

Reset

| Descriptions                                                                                                                                                                                                                                   | Graphic Summary              | Alignments | Taxonomy    |             |         |           |          |                          |
|------------------------------------------------------------------------------------------------------------------------------------------------------------------------------------------------------------------------------------------------|------------------------------|------------|-------------|-------------|---------|-----------|----------|--------------------------|
| Sequences producing significant alignments                                                                                                                                                                                                     |                              |            |             |             |         |           |          |                          |
| Download <span>New</span> Select columns Show 100 ?                                                                                                                                                                                            |                              |            |             |             |         |           |          |                          |
| <input checked="" type="checkbox"/> select all 100 sequences selected <a href="#">GenPept</a> <a href="#">Graphics</a> <a href="#">Distance tree of results</a> <a href="#">Multiple alignment</a> <span>New</span> <a href="#">MSA Viewer</a> |                              |            |             |             |         |           |          |                          |
| Description                                                                                                                                                                                                                                    | Scientific Name              | Max Score  | Total Score | Query Cover | E value | Per Ident | Acc. Len | Accession                |
| <input checked="" type="checkbox"/> RecName: Full=Transforming growth factor-beta-induced protein ig-h3; Short=Beta ig-h3; AltName: Full=Kerato-s...                                                                                           | <a href="#">Homo sapiens</a> | 24.8       | 24.8        | 100%        | 0.15    | 100.00%   | 683      | <a href="#">Q15582.1</a> |
| <input checked="" type="checkbox"/> RecName: Full=Kinesin-like protein KIFC1; AltName: Full=Kinesin-like protein 2; AltName: Full=Kinesin-related pr...                                                                                        | <a href="#">Homo sapiens</a> | 19.7       | 19.7        | 100%        | 10      | 70.00%    | 673      | <a href="#">Q9BW19.2</a> |
| <input checked="" type="checkbox"/> RecName: Full=Ankyrin repeat domain-containing protein 10 [Homo sapiens]                                                                                                                                   | <a href="#">Homo sapiens</a> | 19.3       | 19.3        | 85%         | 15      | 83.33%    | 420      | <a href="#">Q9NXR5.2</a> |
| <input checked="" type="checkbox"/> RecName: Full=Coiled-coil domain-containing protein 168 [Homo sapiens]                                                                                                                                     | <a href="#">Homo sapiens</a> | 18.9       | 18.9        | 71%         | 21      | 100.00%   | 2452     | <a href="#">Q8NDH2.2</a> |
| <input checked="" type="checkbox"/> RecName: Full=Clathrin heavy chain 1; AltName: Full=Clathrin heavy chain on chromosome 17; Short=CLH-17 [H...                                                                                              | <a href="#">Homo sapiens</a> | 18.5       | 18.5        | 100%        | 30      | 71.43%    | 1675     | <a href="#">Q00610.5</a> |
| <input checked="" type="checkbox"/> RecName: Full=DDP1- and CUL4-associated factor 1; AltName: Full=HIV-1 Vpr-binding protein; Short=VprBP; Alt...                                                                                             | <a href="#">Homo sapiens</a> | 18.5       | 33.5        | 71%         | 30      | 100.00%   | 1507     | <a href="#">Q9Y4B6.3</a> |
| <input checked="" type="checkbox"/> RecName: Full=Disintegrin and metalloproteinase domain-containing protein 12; Short=ADAM 12; AltName: Full=...                                                                                             | <a href="#">Homo sapiens</a> | 18.5       | 18.5        | 71%         | 30      | 100.00%   | 909      | <a href="#">Q43184.3</a> |
| <input checked="" type="checkbox"/> RecName: Full=Cytochrome P450 2U1; AltName: Full=Long-chain fatty acid omega-monooxygenase [Homo sapie...                                                                                                  | <a href="#">Homo sapiens</a> | 18.5       | 18.5        | 85%         | 30      | 83.33%    | 544      | <a href="#">Q7Z449.1</a> |
| <input checked="" type="checkbox"/> RecName: Full=Lysophosphatidic acid receptor 4; Short=LPA receptor 4; Short=LPA-4; AltName: Full=G-protein c...                                                                                            | <a href="#">Homo sapiens</a> | 18.5       | 18.5        | 85%         | 30      | 83.33%    | 370      | <a href="#">Q99677.1</a> |

Peptide IPSETLNR (m/z= 929.508)

IPSETLNR 929.505 929.508 0.003 3.23 TGFB1

| Job Title     | Protein Sequence                                                                                                         |
|---------------|--------------------------------------------------------------------------------------------------------------------------|
| RID           | ZUS2E8DX013 <small>Search expires on 01-13 15:39 pm</small> <a href="#">Download All</a> ▼                               |
| Program       | BLASTP <a href="#">Citation</a> ▼                                                                                        |
| Database      | swissprot <a href="#">See details</a> ▼                                                                                  |
| Query ID      | lcl Query_54440                                                                                                          |
| Description   | None                                                                                                                     |
| Molecule type | amino acid                                                                                                               |
| Query Length  | 7                                                                                                                        |
| Other reports | <a href="#">Distance tree of results</a> <a href="#">Multiple alignment</a> <a href="#">MSA viewer</a> <a href="#">?</a> |

Filter Results

Organism only top 20 will appear ☐ exclude

[+ Add organism](#)

Percent Identity  to

E value  to

Query Coverage  to

Filter

Reset

| Descriptions                                                                                                                                                                                                                    | Graphic Summary | Alignments | Taxonomy    |             |         |            |          |                          |
|---------------------------------------------------------------------------------------------------------------------------------------------------------------------------------------------------------------------------------|-----------------|------------|-------------|-------------|---------|------------|----------|--------------------------|
| Sequences producing significant alignments                                                                                                                                                                                      |                 |            |             |             |         |            |          |                          |
| Download <span>▼</span> <span>New</span> Select columns <span>▼</span> Show <span>100</span> <span>▼</span> <span>?</span>                                                                                                      |                 |            |             |             |         |            |          |                          |
| <input checked="" type="checkbox"/> select all 100 sequences selected <span>GenPept</span> <span>Graphics</span> <span>Distance tree of results</span> <span>Multiple alignment</span> <span>New</span> <span>MSA Viewer</span> |                 |            |             |             |         |            |          |                          |
| Description                                                                                                                                                                                                                     | Scientific Name | Max Score  | Total Score | Query Cover | E value | Per. Ident | Acc. Len | Accession                |
| <input checked="" type="checkbox"/> RecName: Full=Transforming growth factor-beta-induced protein ig-h3; Short=Beta ig-h3; AltName: Full=Kerato-epitheli... Homo sapiens                                                        | Homo sapiens    | 25.7       | 25.7        | 100%        | 0.075   | 100.00%    | 683      | <a href="#">Q15582.1</a> |
| <input checked="" type="checkbox"/> RecName: Full=AP-5 complex subunit zeta-1; AltName: Full=Adaptor-related protein complex 5 zeta subunit; Short=Zet... Homo sapiens                                                          | Homo sapiens    | 23.1       | 23.1        | 85%         | 0.62    | 100.00%    | 807      | <a href="#">Q43299.2</a> |
| <input checked="" type="checkbox"/> RecName: Full=BTB/POZ domain-containing protein KCTD7 [Homo sapiens] Homo sapiens                                                                                                           | Homo sapiens    | 23.1       | 23.1        | 85%         | 0.62    | 100.00%    | 289      | <a href="#">Q96MP8.1</a> |
| <input checked="" type="checkbox"/> RecName: Full=Vertnin [Homo sapiens] Homo sapiens                                                                                                                                           | Homo sapiens    | 22.3       | 22.3        | 85%         | 1.2     | 100.00%    | 702      | <a href="#">Q9H8Y1.1</a> |
| <input checked="" type="checkbox"/> RecName: Full=Endoplasmic reticulum-Golgi intermediate compartment protein 2 [Homo sapiens] Homo sapiens                                                                                    | Homo sapiens    | 22.3       | 22.3        | 85%         | 1.2     | 100.00%    | 377      | <a href="#">Q96RQ1.2</a> |
| <input checked="" type="checkbox"/> RecName: Full=Forkhead box protein D4-like 3; Short=FOXD4-like 3 [Homo sapiens] Homo sapiens                                                                                                | Homo sapiens    | 21.4       | 33.9        | 100%        | 2.5     | 85.71%     | 417      | <a href="#">Q6VB84.2</a> |
| <input checked="" type="checkbox"/> RecName: Full=Forkhead box protein D4-like 6; Short=FOXD4-like 6 [Homo sapiens] Homo sapiens                                                                                                | Homo sapiens    | 21.4       | 33.9        | 100%        | 2.5     | 85.71%     | 417      | <a href="#">Q3SYB3.2</a> |
| <input checked="" type="checkbox"/> RecName: Full=Forkhead box protein D4-like 5; Short=FOXD4-like 5 [Homo sapiens] Homo sapiens                                                                                                | Homo sapiens    | 21.4       | 33.9        | 100%        | 2.5     | 85.71%     | 416      | <a href="#">Q5VY16.1</a> |
| <input checked="" type="checkbox"/> RecName: Full=Forkhead box protein D4-like 4; Short=FOXD4-like 4; AltName: Full=Forkhead box protein D4-like 2; Alt... Homo sapiens                                                         | Homo sapiens    | 21.4       | 33.9        | 100%        | 2.5     | 85.71%     | 416      | <a href="#">Q8WXT5.2</a> |
| <input checked="" type="checkbox"/> RecName: Full=SH3 domain-containing kinase-binding protein 1; AltName: Full=CD2-binding protein 3; Short=CD2BP3... Homo sapiens                                                             | Homo sapiens    | 21.0       | 21.0        | 100%        | 3.6     | 77.78%     | 665      | <a href="#">Q96B97.2</a> |
| <input checked="" type="checkbox"/> RecName: Full=Exocyst complex component 3-like protein 4 [Homo sapiens] Homo sapiens                                                                                                        | Homo sapiens    | 20.6       | 20.6        | 100%        | 5.1     | 85.71%     | 722      | <a href="#">Q17RC7.2</a> |

Peptide DGTTPIDAHTR (m/z = 1179.579)

DGTTPIDAHTR 1179.575 1179.579 0.004 3.39

TGFBI

|               |                                                                                                                          |
|---------------|--------------------------------------------------------------------------------------------------------------------------|
| Job Title     | Protein Sequence                                                                                                         |
| RID           | <a href="#">ZUS6RYW8013</a> Search expires on 01-13 15:41 pm <a href="#">Download All</a> ▼                              |
| Program       | BLASTP <a href="#">?</a> <a href="#">Citation</a> ▼                                                                      |
| Database      | swissprot <a href="#">See details</a> ▼                                                                                  |
| Query ID      | lcl Query_59003                                                                                                          |
| Description   | None                                                                                                                     |
| Molecule type | amino acid                                                                                                               |
| Query Length  | 11                                                                                                                       |
| Other reports | <a href="#">Distance tree of results</a> <a href="#">Multiple alignment</a> <a href="#">MSA viewer</a> <a href="#">?</a> |

Filter Results

Organism

only top 20 will appear

☐ exclude

[+ Add organism](#)

Percent Identity

to

E value

to

Query Coverage

to

Filter

Reset

- Descriptions
- Graphic Summary
- Alignments
- Taxonomy

| Sequences producing significant alignments                                                                                                                                                                                                     |                                                                                                                       |                 |           |             |             |         |            |          |                          |
|------------------------------------------------------------------------------------------------------------------------------------------------------------------------------------------------------------------------------------------------|-----------------------------------------------------------------------------------------------------------------------|-----------------|-----------|-------------|-------------|---------|------------|----------|--------------------------|
| Download ▼ <span>New</span> Select columns ▼ Show 100 ▼ <a href="#">?</a>                                                                                                                                                                      |                                                                                                                       |                 |           |             |             |         |            |          |                          |
| <input checked="" type="checkbox"/> select all 100 sequences selected <a href="#">GenPept</a> <a href="#">Graphics</a> <a href="#">Distance tree of results</a> <a href="#">Multiple alignment</a> <span>New</span> <a href="#">MSA Viewer</a> |                                                                                                                       |                 |           |             |             |         |            |          |                          |
|                                                                                                                                                                                                                                                | Description                                                                                                           | Scientific Name | Max Score | Total Score | Query Cover | E value | Per. Ident | Acc. Len | Accession                |
| <input checked="" type="checkbox"/>                                                                                                                                                                                                            | RecName: Full=Transforming growth factor-beta-induced protein ig-h3; Short=Beta ig-h3; AltName: Full=Kerato-epith...  | Homo sapiens    | 38.4      | 38.4        | 100%        | 5e-06   | 100.00%    | 683      | <a href="#">Q15582.1</a> |
| <input checked="" type="checkbox"/>                                                                                                                                                                                                            | RecName: Full=Nesprin-2; AltName: Full=KASH domain-containing protein 2; Short=KASH2; AltName: Full=Nuclear...        | Homo sapiens    | 21.0      | 21.0        | 72%         | 8.7     | 75.00%     | 6885     | <a href="#">Q8WXH0.3</a> |
| <input checked="" type="checkbox"/>                                                                                                                                                                                                            | RecName: Full=Zinc finger protein 469 [Homo sapiens]                                                                  | Homo sapiens    | 21.0      | 30.5        | 90%         | 8.7     | 75.00%     | 3925     | <a href="#">Q96JG9.3</a> |
| <input checked="" type="checkbox"/>                                                                                                                                                                                                            | RecName: Full=Protocadherin-16; AltName: Full=Cadherin-19; AltName: Full=Cadherin-25; AltName: Full=Fibroblast...     | Homo sapiens    | 21.0      | 98.0        | 90%         | 8.7     | 70.00%     | 3298     | <a href="#">Q96JQ0.1</a> |
| <input checked="" type="checkbox"/>                                                                                                                                                                                                            | RecName: Full=Hermansky-Pudlak syndrome 1 protein [Homo sapiens]                                                      | Homo sapiens    | 21.0      | 21.0        | 63%         | 8.7     | 85.71%     | 700      | <a href="#">Q92902.2</a> |
| <input checked="" type="checkbox"/>                                                                                                                                                                                                            | RecName: Full=NACHT domain- and WD repeat-containing protein 1 [Homo sapiens]                                         | Homo sapiens    | 20.6      | 30.1        | 72%         | 12      | 63.64%     | 1564     | <a href="#">Q149M9.3</a> |
| <input checked="" type="checkbox"/>                                                                                                                                                                                                            | RecName: Full=Transmembrane protein 232 [Homo sapiens]                                                                | Homo sapiens    | 20.6      | 20.6        | 54%         | 12      | 83.33%     | 657      | <a href="#">C9JQI7.2</a> |
| <input checked="" type="checkbox"/>                                                                                                                                                                                                            | RecName: Full=P antigen family member 4; Short=PAGE-4; AltName: Full=G antigen family C member 1; AltName: ...        | Homo sapiens    | 20.6      | 20.6        | 63%         | 12      | 71.43%     | 102      | <a href="#">Q60829.1</a> |
| <input checked="" type="checkbox"/>                                                                                                                                                                                                            | RecName: Full=Tubulinyl-Tyr carboxypeptidase 2; AltName: Full=Vasohibin-2; AltName: Full=Vasohibin-like protein [...] | Homo sapiens    | 20.2      | 20.2        | 54%         | 18      | 83.33%     | 355      | <a href="#">Q86V25.2</a> |

Peptide LTLLAPLNSVFK (m/z= 1315.802)

LTLLAPLNSVFK 1315.798 1315.802 0.004 3.04

TGFBI

|               |                                                                                                                          |
|---------------|--------------------------------------------------------------------------------------------------------------------------|
| Job Title     | Protein Sequence                                                                                                         |
| RID           | <a href="#">ZUS6B3EG013</a> Search expires on 01-13 15:41 pm <a href="#">Download All</a> ▼                              |
| Program       | BLASTP <a href="#">?</a> <a href="#">Citation</a> ▼                                                                      |
| Database      | swissprot <a href="#">See details</a> ▼                                                                                  |
| Query ID      | lcl Query_49253                                                                                                          |
| Description   | None                                                                                                                     |
| Molecule type | amino acid                                                                                                               |
| Query Length  | 12                                                                                                                       |
| Other reports | <a href="#">Distance tree of results</a> <a href="#">Multiple alignment</a> <a href="#">MSA viewer</a> <a href="#">?</a> |

Filter Results

Organism

only top 20 will appear

☐ exclude

[+ Add organism](#)

Percent Identity

to

E value

to

Query Coverage

to

Filter

Reset

- Descriptions
- Graphic Summary
- Alignments
- Taxonomy

| Sequences producing significant alignments                                                                                                                                                                                                     |                                                                                                                         |                 |           |             |             |         |            |          |                          |
|------------------------------------------------------------------------------------------------------------------------------------------------------------------------------------------------------------------------------------------------|-------------------------------------------------------------------------------------------------------------------------|-----------------|-----------|-------------|-------------|---------|------------|----------|--------------------------|
| Download ▼ <span>New</span> Select columns ▼ Show 100 ▼ <a href="#">?</a>                                                                                                                                                                      |                                                                                                                         |                 |           |             |             |         |            |          |                          |
| <input checked="" type="checkbox"/> select all 100 sequences selected <a href="#">GenPept</a> <a href="#">Graphics</a> <a href="#">Distance tree of results</a> <a href="#">Multiple alignment</a> <span>New</span> <a href="#">MSA Viewer</a> |                                                                                                                         |                 |           |             |             |         |            |          |                          |
|                                                                                                                                                                                                                                                | Description                                                                                                             | Scientific Name | Max Score | Total Score | Query Cover | E value | Per. Ident | Acc. Len | Accession                |
| <input checked="" type="checkbox"/>                                                                                                                                                                                                            | RecName: Full=Transforming growth factor-beta-induced protein ig-h3; Short=Beta ig-h3; AltName: Full=Kerato-epithell... | Homo sapiens    | 39.7      | 59.4        | 100%        | 2e-06   | 100.00%    | 683      | <a href="#">Q15582.1</a> |
| <input checked="" type="checkbox"/>                                                                                                                                                                                                            | RecName: Full=Perlestin; Short=PN; AltName: Full=Osteoblast-specific factor 2; Short=OSF-2; Flags: Precursor (Homo...   | Homo sapiens    | 23.5      | 65.3        | 91%         | 1.3     | 70.00%     | 836      | <a href="#">Q15063.2</a> |
| <input checked="" type="checkbox"/>                                                                                                                                                                                                            | RecName: Full=Monocarboxylate transporter 1; Short=MCT1; AltName: Full=Solute carrier family 16 member 1 (Homo...       | Homo sapiens    | 23.1      | 51.5        | 75%         | 1.8     | 87.50%     | 500      | <a href="#">P53985.3</a> |
| <input checked="" type="checkbox"/>                                                                                                                                                                                                            | RecName: Full=Protein BANP; AltName: Full=BEN domain-containing protein 1; AltName: Full=Btg3-associated nuclea...      | Homo sapiens    | 22.7      | 37.8        | 100%        | 2.6     | 80.00%     | 519      | <a href="#">Q8N9N5.3</a> |
| <input checked="" type="checkbox"/>                                                                                                                                                                                                            | RecName: Full=Zinc finger CCH domain-containing protein 7B; AltName: Full=Rotavirus 'X'-associated non-structural...    | Homo sapiens    | 22.3      | 22.3        | 75%         | 3.7     | 77.78%     | 977      | <a href="#">Q9UGR2.2</a> |
| <input checked="" type="checkbox"/>                                                                                                                                                                                                            | RecName: Full=Fc receptor-like protein 2; Short=FcR-like protein 2; Short=FcRL2; AltName: Full=Fc receptor homolog...   | Homo sapiens    | 22.3      | 37.8        | 100%        | 3.7     | 72.73%     | 508      | <a href="#">Q96LA5.1</a> |
| <input checked="" type="checkbox"/>                                                                                                                                                                                                            | RecName: Full=Vitamin K-dependent protein C; AltName: Full=Anticoagulant protein C; AltName: Full=Autoproteohrombin...  | Homo sapiens    | 22.3      | 22.3        | 58%         | 3.7     | 85.71%     | 461      | <a href="#">P04070.1</a> |
| <input checked="" type="checkbox"/>                                                                                                                                                                                                            | RecName: Full=Vasoactive intestinal polypeptide receptor 2; Short=VIP-R-2; AltName: Full=Helodermin-preferring VIP r... | Homo sapiens    | 22.3      | 35.6        | 83%         | 3.7     | 66.67%     | 438      | <a href="#">P41587.2</a> |
| <input checked="" type="checkbox"/>                                                                                                                                                                                                            | RecName: Full=Serine/arginine-rich splicing factor 11; AltName: Full=Arginine-rich 54 kDa nuclear protein; Short=p54... | Homo sapiens    | 21.8      | 21.8        | 83%         | 5.2     | 70.00%     | 484      | <a href="#">Q05519.1</a> |
| <input checked="" type="checkbox"/>                                                                                                                                                                                                            | RecName: Full=Alpha-2-HS-glycoprotein; AltName: Full=Alpha-2-Z-globulin; AltName: Full=Ba-alpha-2-glycoprotein; Alt...  | Homo sapiens    | 21.4      | 21.4        | 50%         | 7.5     | 100.00%    | 367      | <a href="#">P02765.2</a> |
| <input checked="" type="checkbox"/>                                                                                                                                                                                                            | RecName: Full=Keratin_type II cytoskeletal 72; AltName: Full=Cytokeratin-72; Short=CK-72; AltName: Full=Keratin-72...   | Homo sapiens    | 21.4      | 21.4        | 50%         | 7.5     | 100.00%    | 511      | <a href="#">Q14CN4.2</a> |

1. Venkatraman, A., et al., *Matrix-Assisted Laser Desorption Ionization Mass Spectrometry Imaging of Key Proteins in Corneal Samples from Lattice Dystrophy Patients with TGFBI-H626R and TGFBI-R124C Mutations*. *Proteomics Clin Appl*, 2019. **13**(1): p. e1800053.
